# Supplementary material for: Association of Oral Health with Risk of Rheumatoid Arthritis: A Nationwide Cohort Study
Source: MDPI journal article supplement (doi:10.3390/jpm13020340), 2023-02-15
Supplement: s1 [file s1]

Table S1. Factors associated with the occurrence of rheumatoid arthritis

| Variable                                | Crude HR<br>(95% CI) | p-value | Adjusted HR<br>(95% CI) | p-value |
|-----------------------------------------|----------------------|---------|-------------------------|---------|
| Age, years                              |                      |         |                         |         |
| <65                                     | 1 (reference)        |         | 1 (reference)           |         |
| ≥65                                     | 2.86<br>(2.76, 2.96) | <0.001  | 1.79<br>(1.72, 1.86)    | <0.001  |
| Sex                                     |                      |         |                         |         |
| Male                                    | 1 (reference)        |         | 1 (reference)           |         |
| Female                                  | 2.78<br>(2.72, 2.85) | <0.001  | 2.44<br>(2.36, 2.52)    | <0.001  |
| Body mass index (kg/m <sup>2</sup> )    | 1.00<br>(1.00, 1.00) | 0.082   | 1.00<br>(1.00, 1.00)    | 0.064   |
| Household income                        |                      |         |                         |         |
| Q1, highest                             | 1 (reference)        |         | 1 (reference)           |         |
| Q2                                      | 0.75<br>(0.73, 0.77) | <0.001  | 0.97<br>(0.94, 1.00)    | 0.029   |
| Q3                                      | 0.79<br>(0.77, 0.82) | <0.001  | 1.10<br>(1.07, 1.14)    | <0.001  |
| Q4, lowest                              | 0.97<br>(0.94, 1.01) | 0.192   | 1.22<br>(1.17, 1.27)    | <0.001  |
| Smoking                                 |                      |         |                         |         |
| Never                                   | 1 (reference)        |         | 1 (reference)           |         |
| Former                                  | 0.54<br>(0.52, 0.57) | <0.001  | 0.98<br>(0.94, 1.03)    | 0.499   |
| Current                                 | 0.45<br>(0.44, 0.47) | <0.001  | 0.90<br>(0.87, 0.94)    | <0.001  |
| Alcohol consumption (days/week)         |                      |         |                         |         |
| None                                    | 1 (reference)        |         | 1 (reference)           |         |
| 1-4                                     | 0.53<br>(0.51, 0.54) | <0.001  | 0.83<br>(0.81, 0.86)    | <0.001  |
| ≥5                                      | 0.99<br>(0.92, 1.06) | 0.690   | 1.38<br>(1.28, 1.49)    | <0.001  |
| Regular physical activity (days/week)   |                      |         |                         |         |
| None                                    | 1 (reference)        |         | 1 (reference)           |         |
| 1-4                                     | 0.67<br>(0.65, 0.69) | <0.001  | 0.88<br>(0.86, 0.90)    | <0.001  |
| ≥5                                      | 1.02<br>(0.98, 1.07) | 0.348   | 1.04<br>(0.99, 1.08)    | 0.121   |
| Comorbidities                           |                      |         |                         |         |
| Hypertension                            | 1.65<br>(1.61, 1.70) | <0.001  | 1.39<br>(1.35, 1.44)    | <0.001  |
| Diabetes mellitus                       | 1.52<br>(1.46, 1.58) | <0.001  | 1.21<br>(1.16, 1.26)    | <0.001  |
| Dyslipidemia                            | 1.47<br>(1.42, 1.51) | <0.001  | 1.18<br>(1.14, 1.22)    | <0.001  |
| Atrial fibrillation                     | 1.87<br>(1.49, 2.36) | <0.001  | 1.16<br>(0.92, 1.46)    | 0.211   |
| Cancer                                  | 1.74<br>(1.57, 1.92) | <0.001  | 1.34<br>(1.22, 1.49)    | <0.001  |
| Renal disease                           | 2.12<br>(1.88, 2.39) | <0.001  | 1.18<br>(1.04, 1.33)    | 0.010   |
| Oral health status                      |                      |         |                         |         |
| Periodontitis                           |                      |         |                         |         |
| No                                      | 1 (reference)        |         | 1 (reference)           |         |
| Yes                                     | 1.23<br>(1.15, 1.32) | <0.001  | 1.16<br>(1.08, 1.24)    | <0.001  |
| Number of missing teeth                 |                      |         |                         |         |
| 0                                       | 1 (reference)        |         | 1 (reference)           |         |
| 1-7                                     | 1.28<br>(1.24, 1.32) | <0.001  | 1.20<br>(1.17, 1.24)    | <0.001  |
| 8-14                                    | 2.33<br>(2.13, 2.55) | <0.001  | 1.49<br>(1.36, 1.63)    | <0.001  |
| ≥15                                     | 3.07<br>(2.78, 3.38) | <0.001  | 1.52<br>(1.38, 1.69)    | <0.001  |
| Oral hygiene behaviors                  |                      |         |                         |         |
| Frequency of tooth brushing (times/day) |                      |         |                         |         |
| 0-1                                     | 1 (reference)        |         | 1 (reference)           |         |
| 2                                       | 0.97<br>(0.94, 1.01) | 0.130   | 0.98<br>(0.95, 1.02)    | 0.300   |
| ≥3                                      | 0.74<br>(0.71, 0.77) | <0.001  | 0.76<br>(0.73, 0.79)    | <0.001  |
| Dental scaling                          |                      |         |                         |         |
| No                                      | 1 (reference)        |         | 1 (reference)           |         |
| Yes                                     | 0.88<br>(0.86, 0.91) | <0.001  | 0.96<br>(0.94, 0.99)    | 0.013   |

The multivariable model was adjusted for sex, age, body mass index, income levels, smoking, alcohol consumption, regular physical activity, hypertension, diabetes mellitus, dyslipidemia, atrial fibrillation, cancer, and renal disease.

HR, hazard ratio; CI, confidence interval; Q, quartile.

Table S2. Subgroup analysis for the association of periodontitis with the occurrence of rheumatoid arthritis according to demographics or comorbidities

| Variable                              | Adjusted HR (95% CI) | p-value for interaction effect |
|---------------------------------------|----------------------|--------------------------------|
| Age, years                            |                      | 0.119                          |
| <65                                   | 1.18 (1.10, 1.28)    |                                |
| ≥65                                   | 1.01 (0.87, 1.17)    |                                |
| Sex                                   |                      | 0.059                          |
| Male                                  | 1.18 (1.07, 1.30)    |                                |
| Female                                | 1.12 (1.02, 1.23)    |                                |
| Body mass index (kg/m <sup>2</sup> )  |                      | 0.426                          |
| <25                                   | 1.11 (1.02, 1.21)    |                                |
| ≥25                                   | 1.21 (1.09, 1.35)    |                                |
| Household income                      |                      | 0.069                          |
| Q1, lowest                            | 1.11 (0.98, 1.25)    |                                |
| Q2                                    | 1.29 (1.15, 1.44)    |                                |
| Q3                                    | 1.04 (0.90, 1.20)    |                                |
| Q4, highest                           | 1.16 (0.96, 1.39)    |                                |
| Smoking                               |                      | 0.286                          |
| Never                                 | 1.15 (1.06, 1.24)    |                                |
| Former                                | 1.28 (1.03, 1.59)    |                                |
| Current                               | 1.13 (0.98, 1.31)    |                                |
| Alcohol consumption (days/week)       |                      | 0.562                          |
| None                                  | 1.19 (1.11, 1.29)    |                                |
| 1-4                                   | 1.03 (0.88, 1.21)    |                                |
| ≥5                                    | 1.09 (0.81, 1.46)    |                                |
| Regular physical activity (days/week) |                      | 0.659                          |
| None                                  | 1.17 (1.07, 1.27)    |                                |
| 1-4                                   | 1.17 (1.03, 1.32)    |                                |
| ≥5                                    | 1.08 (0.87, 1.35)    |                                |
| Comorbidities                         |                      |                                |
| Hypertension                          |                      | 0.276                          |
| No                                    | 1.17 (1.08, 1.27)    |                                |
| Yes                                   | 1.12 (1.00, 1.25)    |                                |
| Diabetes mellitus                     |                      | 0.470                          |
| No                                    | 1.16 (1.08, 1.25)    |                                |
| Yes                                   | 1.11 (0.94, 1.32)    |                                |
| Dyslipidemia                          |                      | 0.103                          |
| No                                    | 1.20 (1.12, 1.29)    |                                |
| Yes                                   | 0.95 (0.81, 1.12)    |                                |
| Atrial fibrillation                   |                      | 0.865                          |
| No                                    | 1.16 (1.08, 1.24)    |                                |
| Yes                                   | 1.32 (0.47, 3.71)    |                                |
| Cancer                                |                      | 0.072                          |
| No                                    | 1.17 (1.09, 1.25)    |                                |
| Yes                                   | 0.64 (0.33, 1.24)    |                                |
| Renal disease                         |                      | 0.194                          |
| No                                    | 1.16 (1.09, 1.24)    |                                |
| Yes                                   | 0.80 (0.39, 1.61)    |                                |

HR, hazard ratio; CI, confidence interval; Q, quartile.

Table S3. Association of oral health status and oral hygiene behaviors with the occurrence of rheumatoid arthritis (landmark analysis)

|                                         | Number<br>of participants | Number<br>of events | Event rate (%)<br>(95% CI) | Person-years | Incidence rate<br>(per 1000 person-years) | Adjusted HR<br>(95% CI) | p-value |
|-----------------------------------------|---------------------------|---------------------|----------------------------|--------------|-------------------------------------------|-------------------------|---------|
| Oral health status                      |                           |                     |                            |              |                                           |                         |         |
| Periodontitis                           |                           |                     |                            |              |                                           |                         |         |
| No                                      | 2178141                   | 25060               | 1.15<br>(1.14, 1.16)       | 33356641.45  | 0.75                                      | 1 (reference)           |         |
| Yes                                     | 61445                     | 876                 | 1.43<br>(1.33, 1.52)       | 920926.81    | 0.95                                      | 1.17<br>(1.10, 1.25)    | <0.001  |
| Number of missing teeth                 |                           |                     |                            |              |                                           |                         |         |
| 0                                       | 1841776                   | 20092               | 1.09<br>(1.08, 1.11)       | 28361742.00  | 0.71                                      | 1 (reference)           |         |
| 1–7                                     | 364467                    | 5002                | 1.37<br>(1.33, 1.41)       | 5487185.98   | 0.91                                      | 1.20<br>(1.17, 1.24)    | <0.001  |
| 8–14                                    | 19417                     | 455                 | 2.34<br>(2.13, 2.56)       | 262344.29    | 1.73                                      | 1.50<br>(1.36, 1.65)    | <0.001  |
| ≥15                                     | 13926                     | 387                 | 2.78<br>(2.50, 3.06)       | 166295.99    | 2.33                                      | 1.53<br>(1.38, 1.70)    | <0.001  |
| Oral hygiene behaviors                  |                           |                     |                            |              |                                           |                         |         |
| Frequency of tooth brushing (times/day) |                           |                     |                            |              |                                           |                         |         |
| 0–1                                     | 278143                    | 3598                | 1.29<br>(1.25, 1.34)       | 4127690.67   | 0.87                                      | 1 (reference)           |         |
| 2                                       | 1038206                   | 13350               | 1.29<br>(1.26, 1.31)       | 15873999.08  | 0.84                                      | 0.98<br>(0.94, 1.02)    | 0.280   |
| ≥3                                      | 923237                    | 8988                | 0.97<br>(0.95, 0.99)       | 14275878.52  | 0.63                                      | 0.76<br>(0.73, 0.79)    | <0.001  |
| Dental scaling                          |                           |                     |                            |              |                                           |                         |         |
| No                                      | 1726903                   | 20528               | 1.19<br>(1.17, 1.20)       | 26356296.55  | 0.78                                      | 1 (reference)           |         |
| Yes                                     | 512683                    | 5408                | 1.05<br>(1.03, 1.08)       | 7921271.71   | 0.68                                      | 0.96<br>(0.94, 0.99)    | 0.016   |

The multivariable model was adjusted for sex, age, body mass index, income levels, smoking, alcohol consumption, regular physical activity, hypertension, diabetes mellitus, dyslipidemia, atrial fibrillation, cancer, and renal disease.

CI, confidence interval; HR, hazard ratio.
